# Supplementary material
Source: HighWire-hosted journal article supplement (https://bmjopen.bmj.com/content/10/7/e039730)
Supplement: inline-supplementary-material-2 [file inline-supplementary-material-2.pdf]

**Appendix 2: Proposed Search Strategy for PubMed**

| Search | Search strategy                                                                                                                                                                                                                                                                                                          |
|--------|--------------------------------------------------------------------------------------------------------------------------------------------------------------------------------------------------------------------------------------------------------------------------------------------------------------------------|
| #1     | Search (("2019 nCoV" OR "2019 nCoV" OR "2019 novel coronavirus" OR "COVID-19" [Supplementary Concept] OR "severe acute respiratory syndrome coronavirus 2" [Supplementary Concept] OR "new coronavirus" OR "novel coronavirus" OR "SARS CoV-2" OR (Wuhan AND coronavirus) OR "SARS-CoV" OR "2019-nCoV" OR "SARS-CoV-2")) |
| #2     | (favipiravir [Supplementary Concept] OR Avigan OR T-705 cpd)                                                                                                                                                                                                                                                             |
| #3     | #1 AND #2                                                                                                                                                                                                                                                                                                                |
